# Supplementary material for: Fosl1 overexpression directly activates trophoblast-specific gene expression programs in embryonic stem cells
Source: PubMed Central journal article supplement — Stem Cell Res. Author manuscript; Available in PMC 2018 Apr 16. (PMC5899959; doi:10.1016/j.scr.2017.12.004), 2017-12-13
Supplement: NIHMS938601-supplement-1.pdf [file NIHMS938601-supplement-1.pdf]

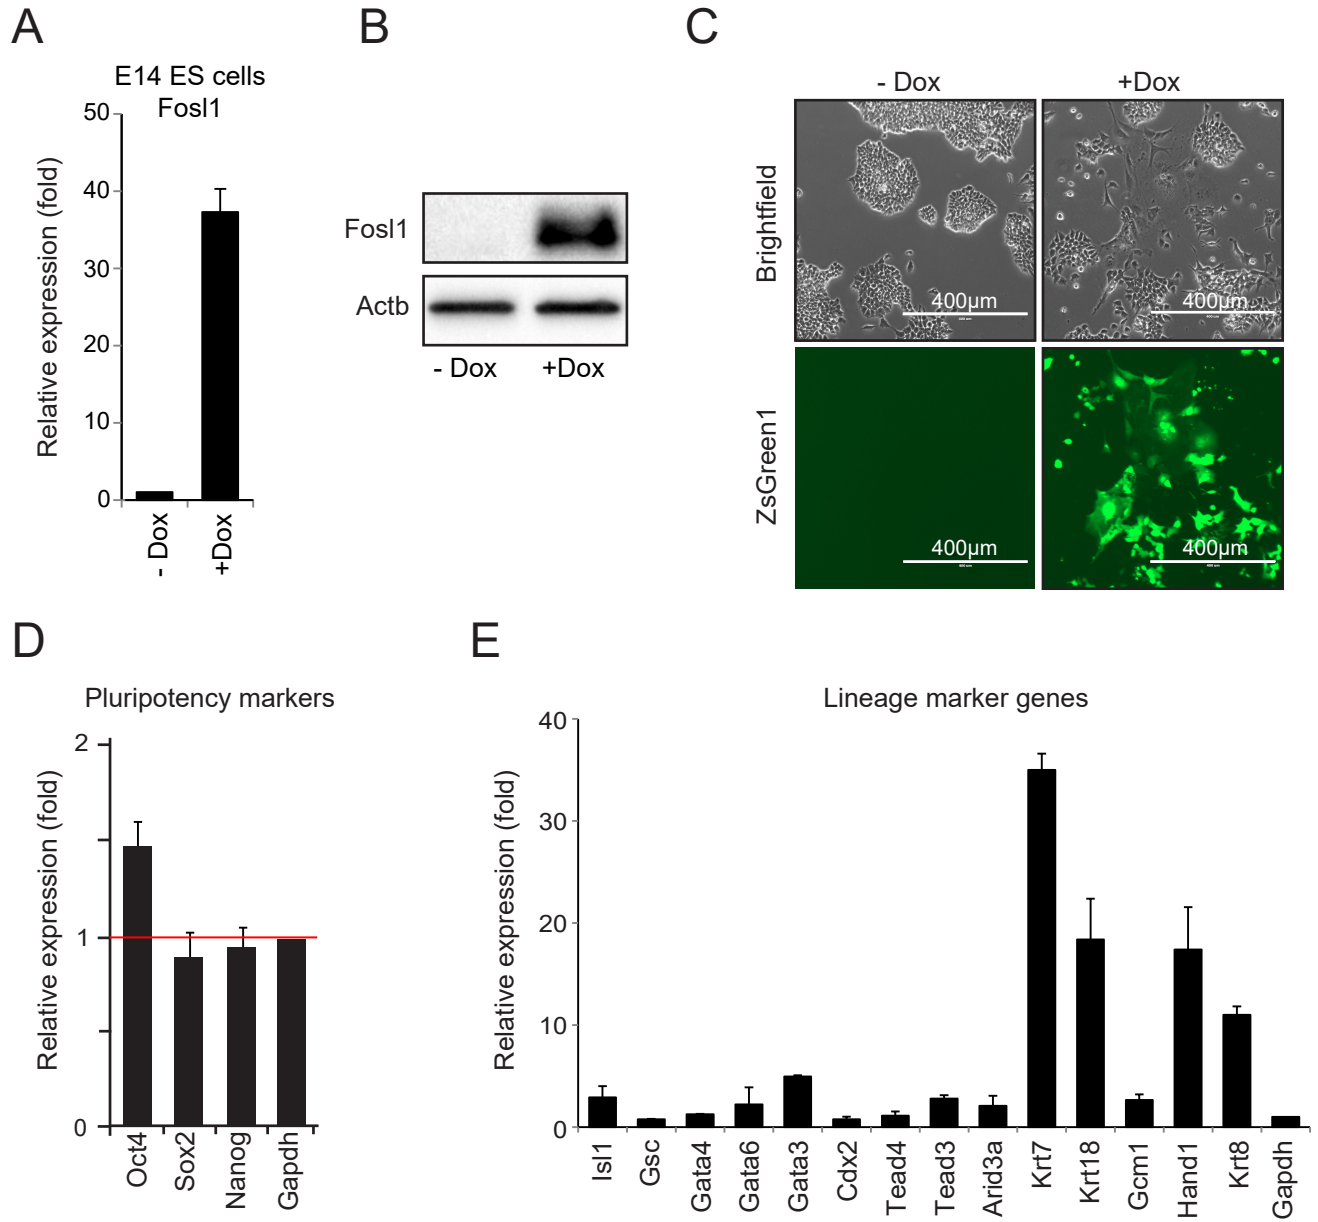

**Supplemental Figure 1. Fosl1 overexpression induces trans-differentiation of E14 ES cells to TS-like cells**

A) Relative mRNA levels of Fosl1 before and after doxycycline (Dox) treatment in Fosl1-inducible E14 ES cells.

B) Protein levels of Fosl1 measured by Western blotting.

C) Bright field (upper panel) and ZsGreen1 expression (bottom panel) images in Fosl1-inducible E14 ES cells before and after Dox treatment for 5 days.

D) Relative mRNA expression levels of the core pluripotency factors before and after Dox treatment.

E) Relative mRNA expression levels of various lineage marker genes including TE markers before and after Dox treatment for 2 days in Fosl1-inducible E14 ES cells.

Fosl1 OE cells were maintained under ES cell culture conditions and error bars in bar graphs depict standard deviations of biological replicates.
